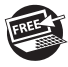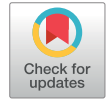

# Association Between Glycemic Variability, HbA<sub>1c</sub>, and Large-for-Gestational-Age Neonates in Women With Type 1 Diabetes

*Diabetes Care* 2017;40:e98–e100 | <https://doi.org/10.2337/dc17-0626>

Rachel T. McGrath,<sup>1,2,3</sup>  
Sarah J. Glastras,<sup>1,3</sup> Sean K. Seeho,<sup>2,4</sup>  
Emma S. Scott,<sup>1</sup> Gregory R. Fulcher,<sup>1,2</sup>  
and Samantha L. Hocking<sup>1,2,5</sup>

Fetal exposure to hyperglycemia is a major determinant of large-for-gestational-age (LGA; birth weight >90th centile for gender) neonates (1), yet targets for glycemic control beyond the first trimester in type 1 diabetes (T1D) pregnancy remain controversial. As HbA<sub>1c</sub> represents a summary measure of glycemic control, it might not adequately reflect acute glucose fluctuations or glycemic variability (GV) that contributes to excess fetal growth. Moreover, neonates born to women who attain HbA<sub>1c</sub> <6% (42 mmol/mol) in the third trimester of pregnancy have an LGA prevalence of 25% (2), with associated adverse perinatal outcomes (3). In contrast to HbA<sub>1c</sub>, continuous glucose monitoring (CGM) allows precise observation of GV. Several studies have demonstrated an association between higher GV and increased birth weight (1,4,5). The capability of GV compared with HbA<sub>1c</sub> to identify women likely to have LGA neonates is, however, unclear. We evaluated the association between various measures of GV, HbA<sub>1c</sub>, and LGA neonates in T1D pregnancy.

Twenty-one pregnant women with T1D were recruited over a 2-year period, and measurements of HbA<sub>1c</sub> and GV (EasyGV, University of Oxford, Oxford, U.K.) using

CGM (Medtronic, Macquarie Park, New South Wales, Australia) were carried out at three time points: 14–18, 24–28, and 32–36 weeks' gestation. The study was approved by the local ethics committee (Northern Sydney Local Health District Human Research Ethics Committee), and all participants gave written informed consent.

The mean ± SD gestational age at delivery was 37.5 ± 1.4 weeks, and birth weight was 3,454 ± 576 g, with eight neonates born LGA. HbA<sub>1c</sub> at each time point was 6.1 ± 0.9%, 6.0 ± 0.8%, and 6.2 ± 1.0%, respectively. The LGA group had significantly higher mean glucose and GV indices than the non-LGA group at 24–28 weeks' gestation (Fig. 1A–D) and higher HbA<sub>1c</sub> at each time point (Fig. 1E).

Linear regression demonstrated a significant association between birth weight centile and each of the glycemic measures at 24–28 weeks of gestation. Because the GV indices demonstrated significant colinearity, we included the J-index alone in subsequent analyses, as it was most strongly correlated with birth weight centile ( $r = 0.853$ ;  $P < 0.0001$ ). Using univariate linear modeling, J-index at 24–28 weeks maintained a significant independent association with

birth weight centile ( $r^2 = 0.229$ ;  $P < 0.05$ ), whereas HbA<sub>1c</sub> did not ( $r^2 = 0.008$ ;  $P = 0.713$ ). The combination of J-index and HbA<sub>1c</sub> at this time point resulted in a greater association with birth weight centile ( $r^2 = 0.477$ ;  $P < 0.01$ ), with mean values of 31.7% and 5.95%, respectively. Furthermore, using cutoffs of HbA<sub>1c</sub> >6% and J-index >30 identified all neonates that were born LGA (receiver operating characteristic curve analysis, data not shown).

Despite attaining close to recommended HbA<sub>1c</sub> target levels for T1D in pregnancy (HbA<sub>1c</sub> ≤6%), our cohort of women demonstrated an ~40% incidence of LGA neonates, which concurs with the results of recently published studies. We found that the optimal combination of glycemic measures associated with LGA neonates is J-index and HbA<sub>1c</sub> measured at 24–28 weeks' gestation. These findings were highly statistically significant, even with a small cohort size. Consequently, our results suggest that CGM (to calculate J-index) and HbA<sub>1c</sub> measured in the late second trimester may be useful clinical tools to identify women with T1D at high risk of LGA neonates; however, this hypothesis should be confirmed in a larger cohort.

<sup>1</sup>Department of Diabetes, Endocrinology and Metabolism, Royal North Shore Hospital, St Leonards, Australia

<sup>2</sup>Northern Clinical School, University of Sydney, St Leonards, Australia

<sup>3</sup>Kolling Institute, University of Sydney, Royal North Shore Hospital, St Leonards, Australia

<sup>4</sup>Clinical and Population Perinatal Health Research, Kolling Institute, Northern Sydney Local Health District, St Leonards, Australia

<sup>5</sup>Charles Perkins Centre, University of Sydney, Sydney, Australia

Corresponding author: Samantha L. Hocking, [samantha.hocking@sydney.edu.au](mailto:samantha.hocking@sydney.edu.au).

Received 29 March 2017 and accepted 11 May 2017.

Clinical trial reg. no. ACTRN12614001295639, [www.anzctr.org.au](http://www.anzctr.org.au).

© 2017 by the American Diabetes Association. Readers may use this article as long as the work is properly cited, the use is educational and not for profit, and the work is not altered. More information is available at <http://www.diabetesjournals.org/content/license>.

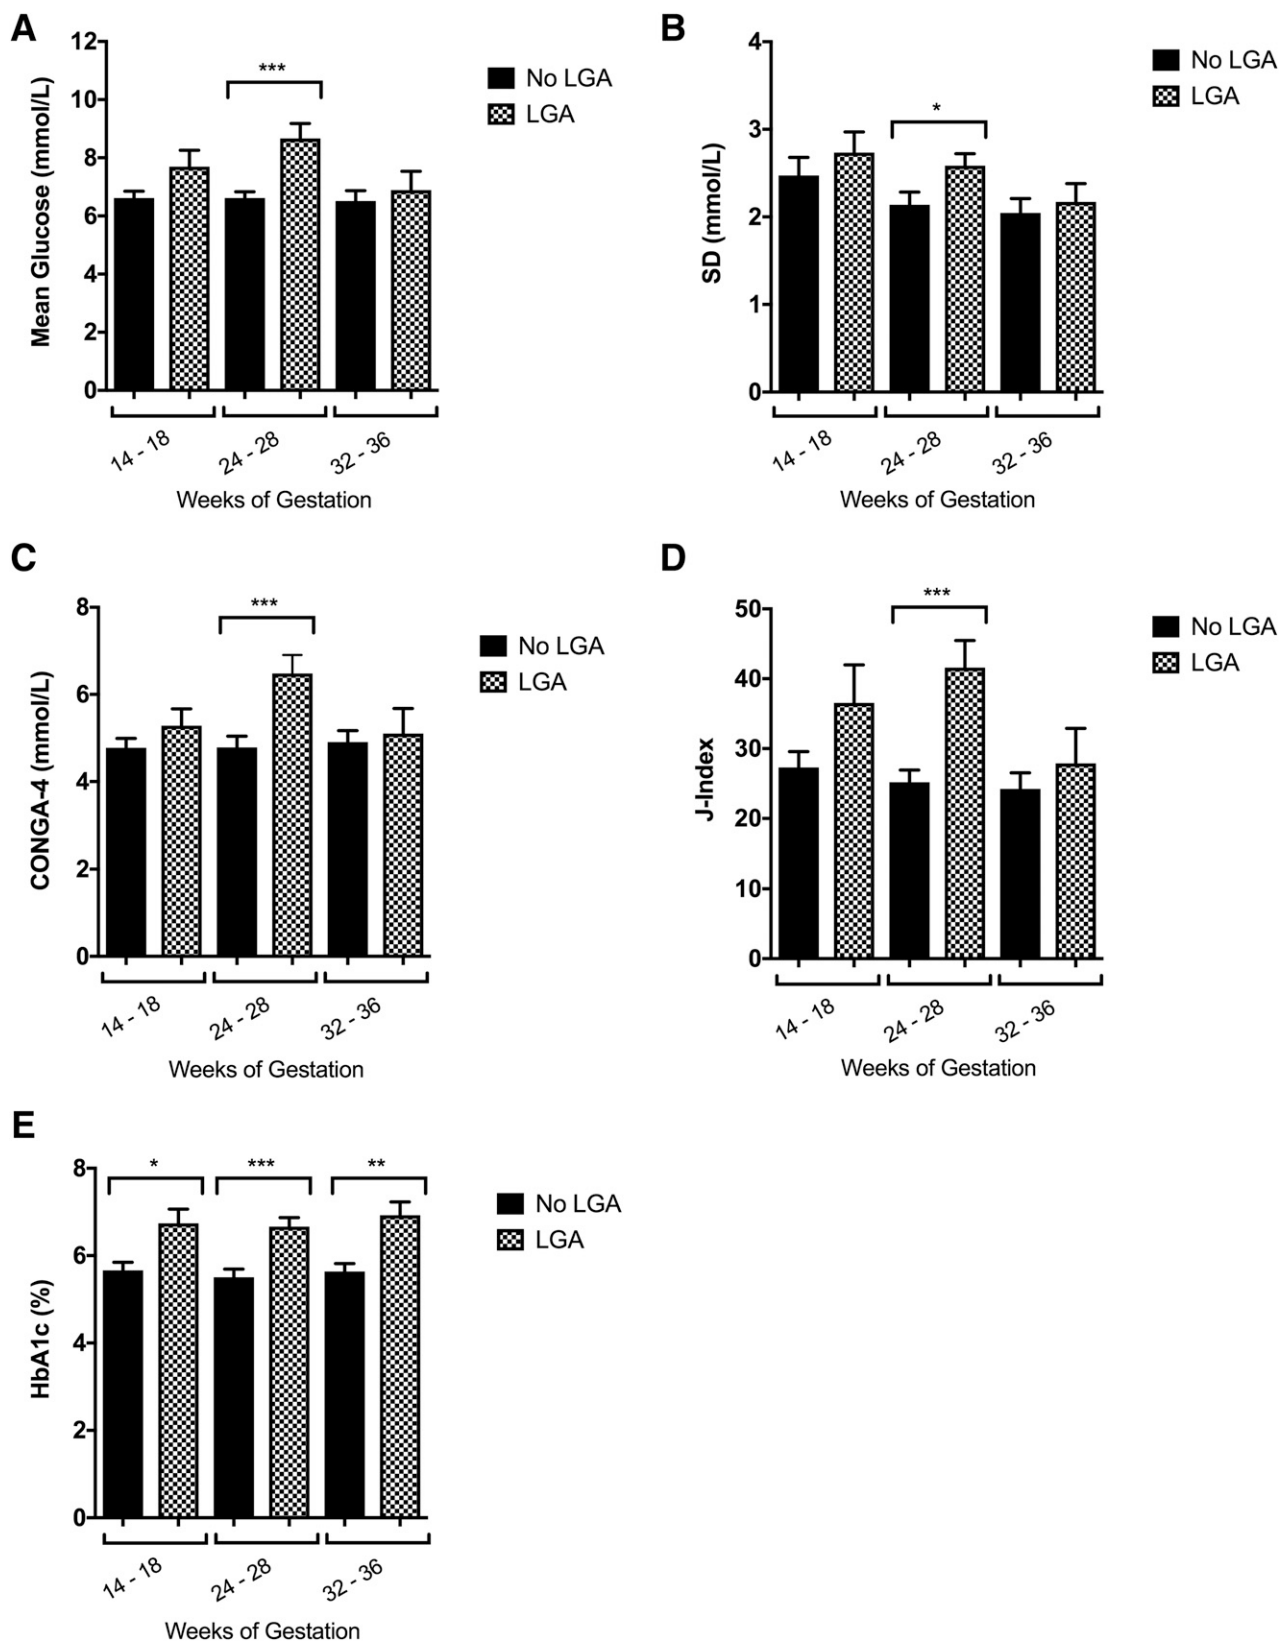

**Figure 1**—Indices of glycemic variability and HbA<sub>1c</sub> at 14–18, 24–28, and 32–36 weeks of gestation were compared between women with and without LGA neonates using the Mann-Whitney *U* test. Results presented as mean ± SEM. \**P* < 0.05; \*\**P* < 0.01; \*\*\**P* < 0.001. CONGA-4, continuous overall net glycemic action at 4 h.

Our results provide an opportunity for future studies to determine whether targeting GV, as well as lowering HbA<sub>1c</sub>, could reduce fetal overgrowth in T1D pregnancy.

**Acknowledgments.** The authors acknowledge Vanessa Donnelly and Carol Palmisano of the Diabetes Education Team at Royal North Shore Hospital for assistance with CGM device insertion and data upload. They also thank all of the women who participated in the study.

**Funding.** This study was supported by funding from the Novo Nordisk Australia Regional Diabetes Support Scheme and the Ramsay Research and Teaching Fund, Sydney, Australia. The funders had no role in the study design or in the decision to submit the manuscript for publication.

**Duality of Interest.** R.T.M., S.J.G., G.R.F., and S.L.H. have received research support for investigator-initiated studies from Novo Nordisk. S.J.G., G.R.F., and S.L.H. have received honoraria from Novo Nordisk. S.J.G. has received honoraria from Medtronic. No other potential conflicts of interest relevant to this article were reported.

**Author Contributions.** R.T.M. recruited participants, collected and analyzed study data, and wrote the first draft of the manuscript. S.J.G., S.K.S., E.S.S., and G.R.F. recruited participants, collected data, and interpreted the results. S.L.H. designed the study, recruited participants, collected data, and interpreted the results. All authors contributed to the manuscript and approved the final version prior to submission. R.T.M. is the guarantor of this work and, as such, had full access to all of the data in the study and takes responsibility for the integrity of the data and the accuracy of the data analysis.

## References

1. Dalfrà MG, Sartore G, Di Cianni G, et al. Glucose variability in diabetic pregnancy. *Diabetes Technol Ther* 2011;13:853–859
2. Feldman AZ, Brown FM. Management of type 1 diabetes in pregnancy. *Curr Diab Rep* 2016;16:76
3. Jensen DM, Damm P, Moelsted-Pedersen L, et al. Outcomes in type 1 diabetic pregnancies: a nationwide, population-based study. *Diabetes Care* 2004;27:2819–2823
4. Law GR, Ellison GT, Secher AL, et al. Analysis of continuous glucose monitoring in pregnant women with diabetes: distinct temporal patterns of glucose associated with large-for-gestational-age infants. *Diabetes Care* 2015;38:1319–1325
5. Gupta R, Khoury J, Altaye M, Dolan L, Szczesniak RD. Glycemic excursions in type 1 diabetes in pregnancy: a semiparametric statistical approach to identify sensitive time points during gestation. *J Diabetes Res* 2017;2017: 2852913
